# Supplementary material for: Improved Method for Electron Powder Diffraction-Based Rietveld Analysis of Nanomaterials
Source: MDPI journal article supplement (doi:10.3390/nano14050444), 2024-02-28
Supplement: s1 [file s1]

Supplementary information

# Improved Method for Electron Powder Diffraction-Based Rietveld Analysis of Nanomaterials

Viktória K. Kis <sup>1,2,\*</sup>, Zsolt Kovács <sup>3</sup> and Zsolt Czigány <sup>1,\*</sup>

<sup>1</sup> HUN-REN Centre for Energy Research, Institute of Technical Physics and Materials Science, Konkoly-Thege Miklós út 29-33, H-1121 Budapest, Hungary

<sup>2</sup> Department of Mineralogy, Eötvös Loránd University, Pázmány Péter sétány 1/c, H-1117 Budapest, Hungary

<sup>3</sup> Department of Materials Physics, Eötvös Loránd University, Pázmány Péter sétány 1/a, H-1117 Budapest, Hungary; kovacs.zsolt@ttk.elte.hu

\* Correspondence: kis.viktoria@ek.hun-ren.hu (V.K.K.); czigany.zsolt@ek.hun-ren.hu (Z.C.)

Table S1: Summary of the results of Rietveld analysis obtained for nanocrystalline hematite

|                       | Results of automated analysis with G0 = 0.6 and G1 = 0 | Results of automated analysis with refined G0 and G1 |
|-----------------------|--------------------------------------------------------|------------------------------------------------------|
| a <sub>0</sub> [Å]    | 5.0366(3)                                              | 5.0386(1)                                            |
| c <sub>0</sub> [Å]    | 13.751(6)                                              | 13.758(2)                                            |
| Crystallite size [nm] | 14.47                                                  | 14.81                                                |
| microstrain           | 8.1·10 <sup>-5</sup>                                   | 2.8·10 <sup>-6</sup>                                 |
| R <sub>wp</sub> [%]   | 1.66                                                   | 1.49                                                 |
| R <sub>exp</sub> [%]  | 5.51                                                   | 5.51                                                 |
| R <sub>B</sub> [%]    | 1.14                                                   | 1.05                                                 |

Table S2: Lattice parameters and crystallite size data of Cu-Ni thin films as obtained after basic and final refinement cycle.

|                          | Cu-Ni thin film deposited at RT |                                   |                             | Cu-Ni thin film deposited at 150 °C |                                   |                             |
|--------------------------|---------------------------------|-----------------------------------|-----------------------------|-------------------------------------|-----------------------------------|-----------------------------|
|                          | Basic refinement                | Refinement with arbitrary texture | Refinement with M-D texture | Basic refinement                    | Refinement with arbitrary texture | Refinement with M-D texture |
| Cu a <sub>0</sub> [Å]    | 3.6084(4)                       | 3.6165(4)                         | 3.6081(9)                   | 3.6142(6)                           | 3.6193(7)                         | 3.6167(3)                   |
| Cu crystallite size [nm] | 8.23                            | 9.5                               | 8.23                        | 25.3                                | 17.1                              | 23.4                        |
| Cu microstrain           | 1.6·10 <sup>-3</sup>            | 3.5·10 <sup>-3</sup>              | 1.6·10 <sup>-3</sup>        | 4.2·10 <sup>-4</sup>                | 7.3·10 <sup>-5</sup>              | 1.9·10 <sup>-4</sup>        |
| Cu at%                   | 58.4                            | 60.1                              | 60.4                        | 30.7                                | 35.8                              | 31.6                        |
| Cu (111) M-D param       |                                 |                                   | 0.71                        |                                     |                                   | 0.77                        |
| Ni a <sub>0</sub> [Å]    | 3.5239(3)                       | 3.5310(1)                         | 3.5236(3)                   | 3.5192(5)                           | 3.5238(9)                         | 3.5219(9)                   |
| Ni crystallite size [nm] | 5.44                            | 6.11                              | 5.44                        | 10.9                                | 11.4                              | 11.7                        |
| Ni microstrain           | 3.5·10 <sup>-3</sup>            | 5.6·10 <sup>-3</sup>              | 3.4·10 <sup>-3</sup>        | 1.9·10 <sup>-4</sup>                | 4.5·10 <sup>-5</sup>              | 3.8·10 <sup>-5</sup>        |
| Ni at%                   | 41.6                            | 39.9                              | 39.6                        | 69.3                                | 64.2                              | 68.4                        |
| Ni (111) M-D param       |                                 |                                   | 0.67                        |                                     |                                   | 1                           |
| R <sub>wp</sub> [%]      | 6.80                            | 2.01                              | 4.27                        | 3.24                                | 2.5                               | 3.21                        |
| R <sub>exp</sub> [%]     | 4.30                            | 4.31                              | 4.13                        | 6.07                                | 6.08                              | 6.07                        |
| R <sub>B</sub> [%]       | 5.11                            | 3.06                              | 4.19                        | 4.29                                | 3.95                              | 4.28                        |
